# Supplementary material for: Technical note: Rapid phase identification of apatite and zircon grains for geochronology using X-ray micro-computed tomography
Source: Copernicus journal article supplement (doi:10.5194/gchron-4-501-2022), 2022-07-21
Supplement: Supplementary file 1 [file gchron-4-501-2022-supplement.zip]

Archive with 2 entries (2 files):
- MicroCT grain data Supplement for Cooperdock et al GChron.xlsx
- gchron-4-501-2022-supplement-title-page.pdf
