# Supplementary material for: Technical note: Rapid phase identification of apatite and zircon grains for geochronology using X-ray micro-computed tomography
Source: Copernicus journal article supplement (doi:10.5194/gchron-4-501-2022), 2022-07-21
Supplement: Supplementary file 1 [file gchron-4-501-2022-supplement.zip › gchron-4-501-2022-supplement-title-page.pdf]

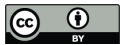

*Supplement of*

**Technical note: Rapid phase identification of apatite and zircon grains for geochronology using X-ray micro-computed tomography**

**Emily H. G. Cooperdock et al.**

*Correspondence to:* Emily H. G. Cooperdock (cooperdo@usc.edu)

- gchron-4-501-2022-supplement-title-page.pdf
- MicroCT grain data Supplement for Cooperdock et al GChron.xlsx

The copyright of individual parts of the supplement might differ from the article licence.
